# Supplementary material for: [Retracted] Effect of Tumor Microenvironment and Angiogenesis on Clinical Outcomes of Primary Central Nervous System Lymphoma
Source: Hindawi journal article supplement (doi:10.1155/2021/3291762), 2021-01-01
Supplement: f1 [file 3291762.f1.docx]

Supplementary Figure S1. The somatic mutation profile of the selective gene for each patient. Red-colored columns indicate somatic mutation. OS: overall survival. S: survived, D: died.
